# Supplementary material for: Synergistic effect of the valence bond environment and exposed crystal facets of the TiO2/SnS2heterojunction for achieving enhanced electrocatalytic oxygen evolution
Source: Royal Society of Chemistry journal article supplement (doi:10.1039/c7ta07073j), 2018-01-01
Supplement: c7ta07073j1.pdf [file c7ta07073j1.pdf]

## **Appendix A. Supporting Information**

### **Synergistic Effect of Valence Bond Environment and Exposed Crystal Facets of TiO<sub>2</sub>/SnS<sub>2</sub> Heterojunction for Achieving Enhanced Electrocatalytic Oxygen Evolution**

Mengyan Li, Hui Liu\*, Ting Lv, Meng Ding

School of Materials Science and Engineering, Shaanxi University of Science &  
Technology, Xi'an 710021, PR China

E-mail: liuhui@sust.edu.cn

Fax: 86-29-86177018

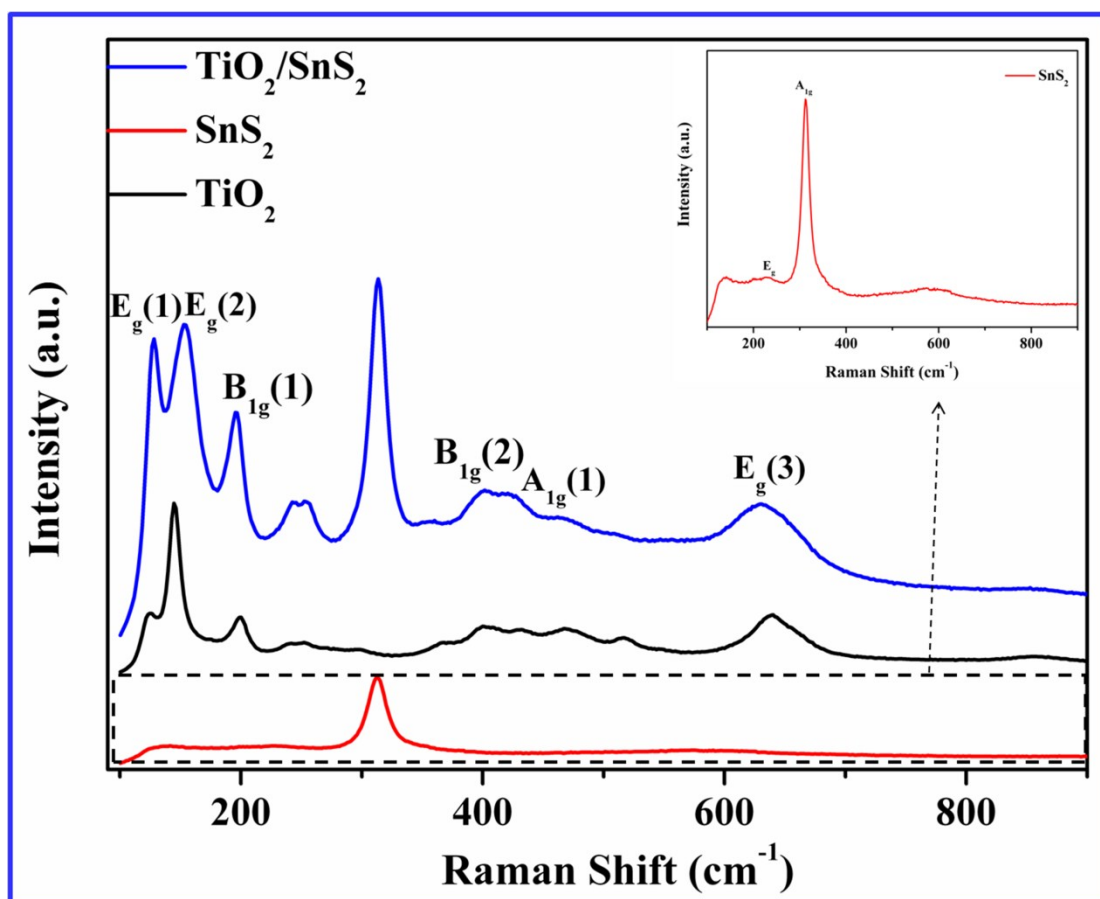

Figure S1. Raman spectra of  $\text{TiO}_2$ ,  $\text{SnS}_2$  and  $\text{TiO}_2/\text{SnS}_2$ .

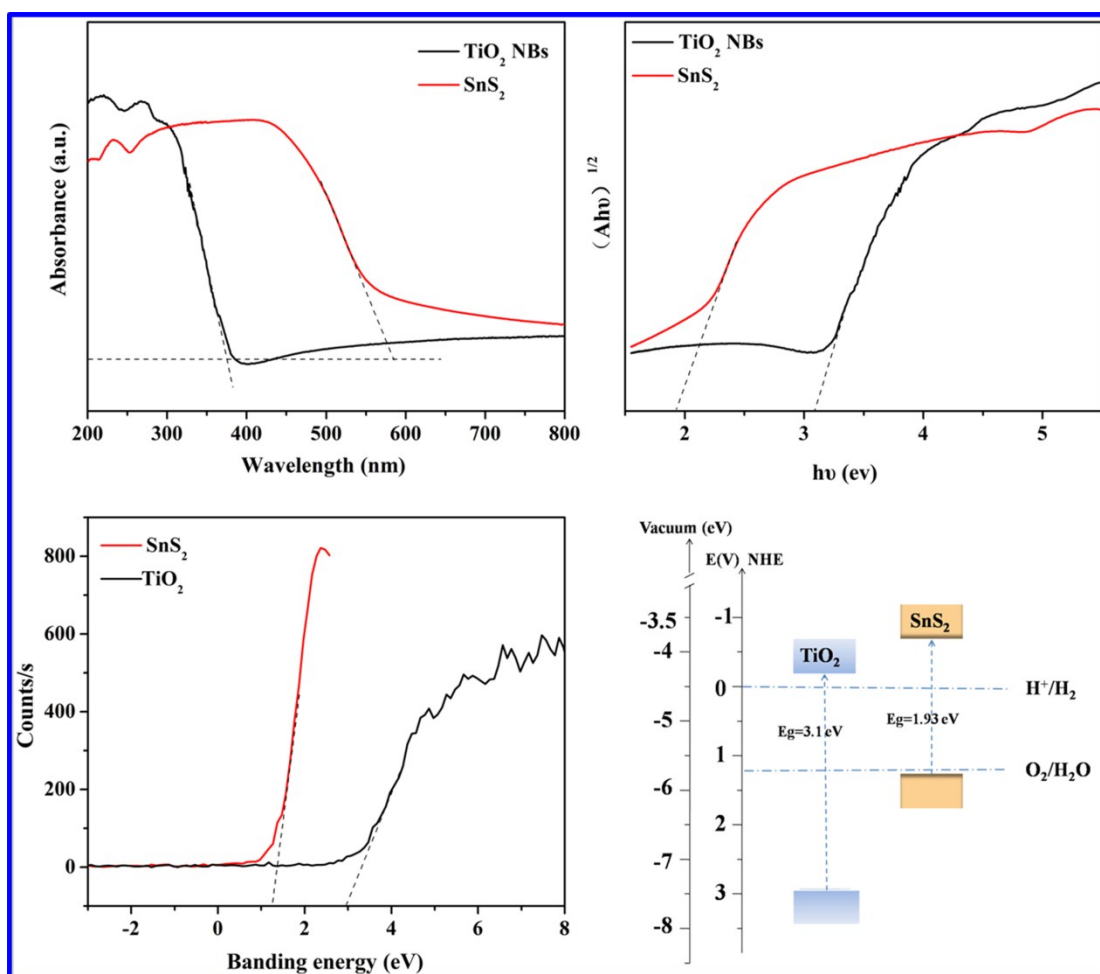

**Figure S2.** UV-visible diffuse reflectance spectra (a) and curves of the Kubelka-Munk function plotted against the photon energy of corresponding samples (b); Valance band spectra (c) and Energy band structure (d) of  $\text{TiO}_2$ ,  $\text{SnS}_2$ , and  $\text{TiO}_2/\text{SnS}_2$ .

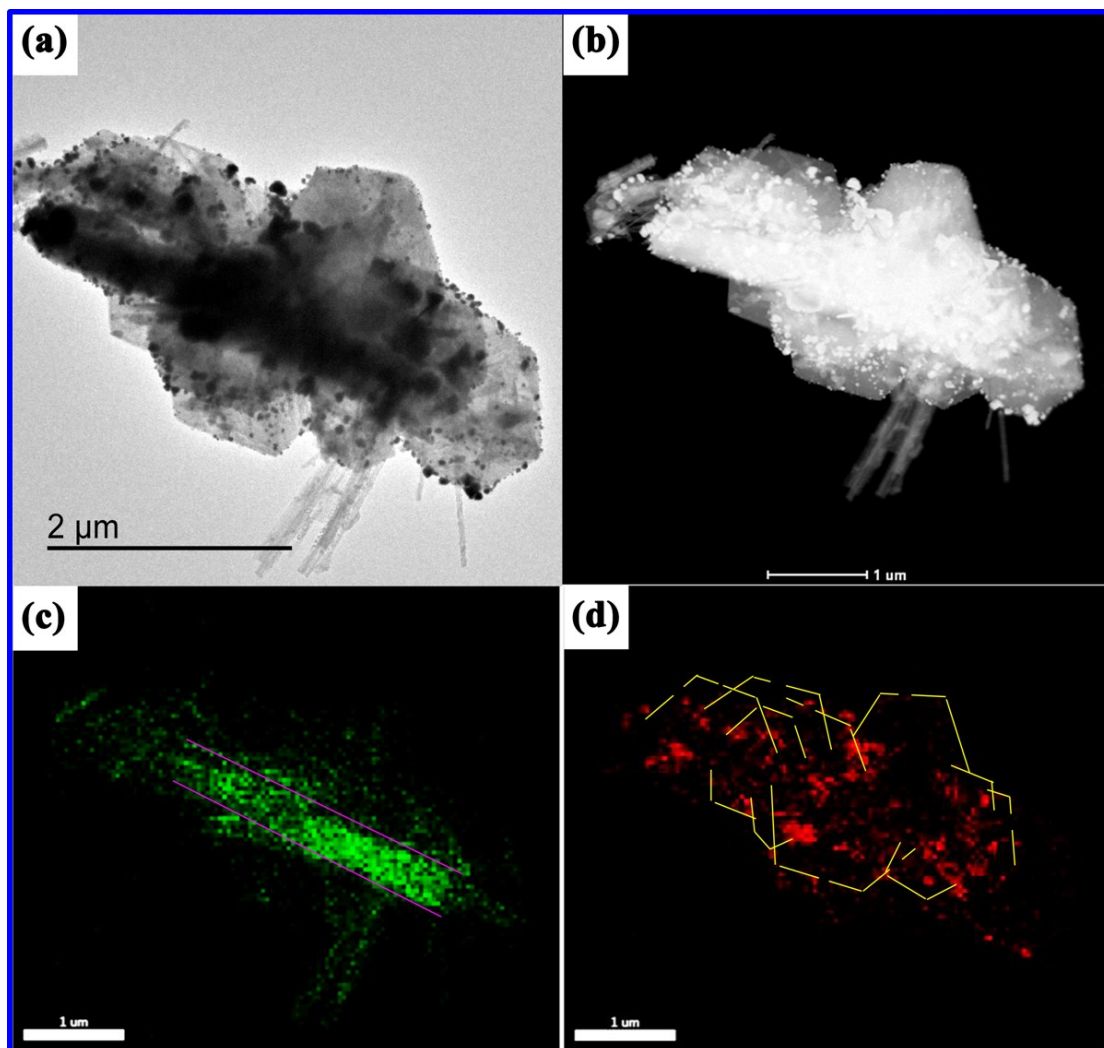

**Figure S3.** TEM image of  $\text{TiO}_2/\text{SnS}_2@\text{Au}$  in low magnification (a) EDX spectrum (b) and Ti (c) and Au (d) elemental mapping of  $\text{TiO}_2/\text{SnS}_2@\text{Au}$ .

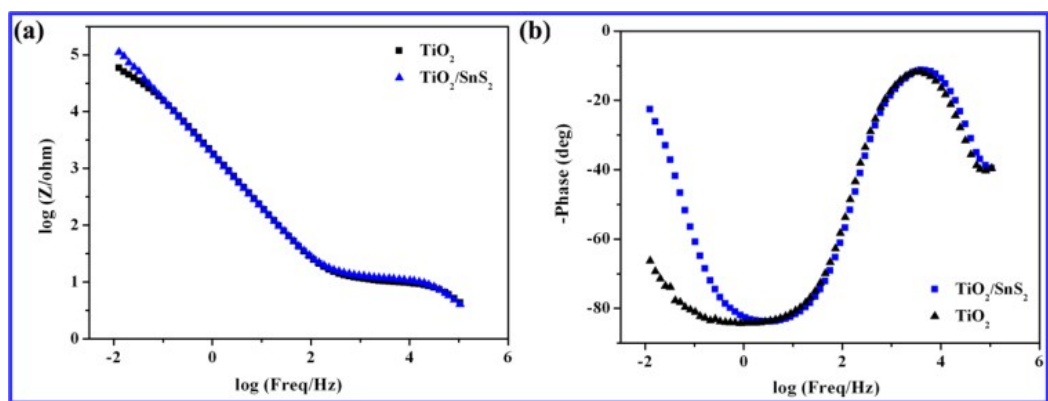

**Figure S4.** (a) Bode-Impedance and (b) Bode-Phase angle plots of  $\text{TiO}_2$  and  $\text{TiO}_2/\text{SnS}_2$ .

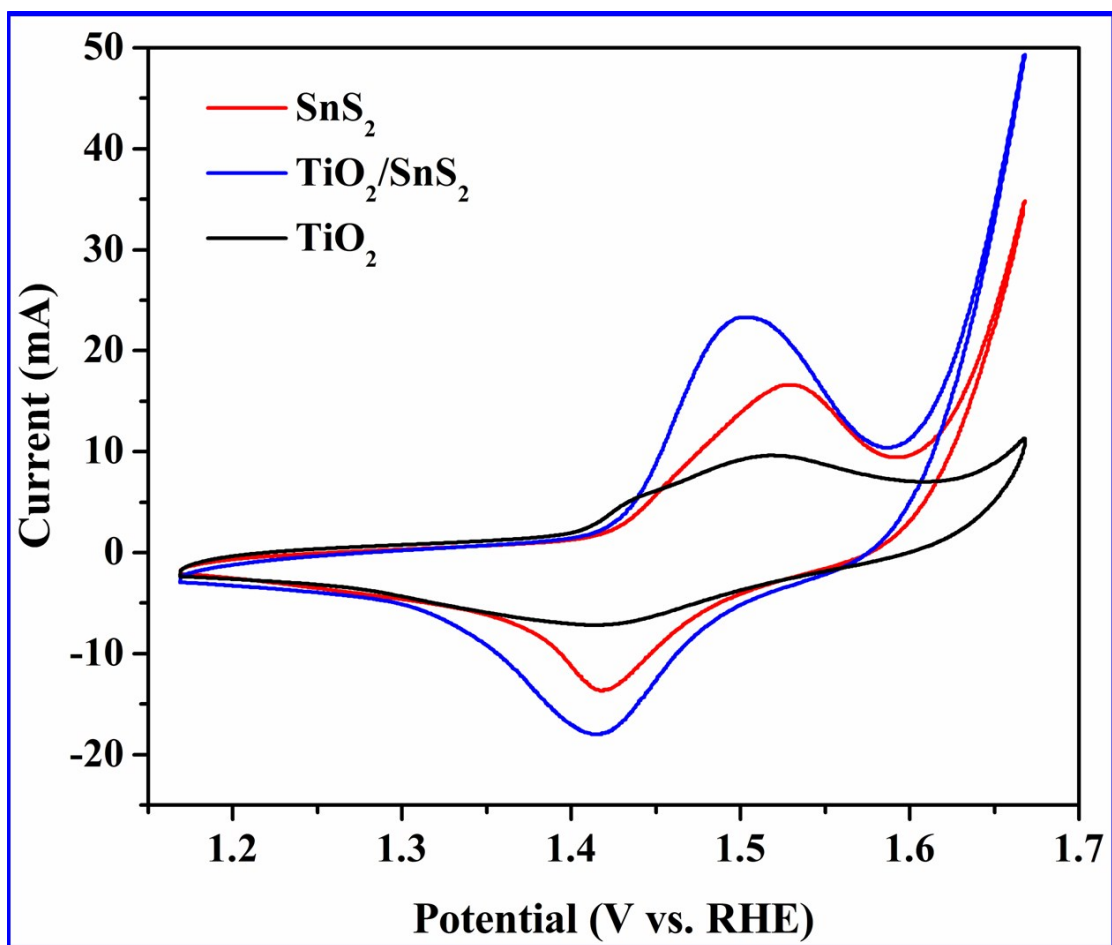

**Figure S5.** CV curves of TiO<sub>2</sub>, SnS<sub>2</sub> and TiO<sub>2</sub>/SnS<sub>2</sub> collected with a scan rate of 100 mV/s in 1M NaOH.

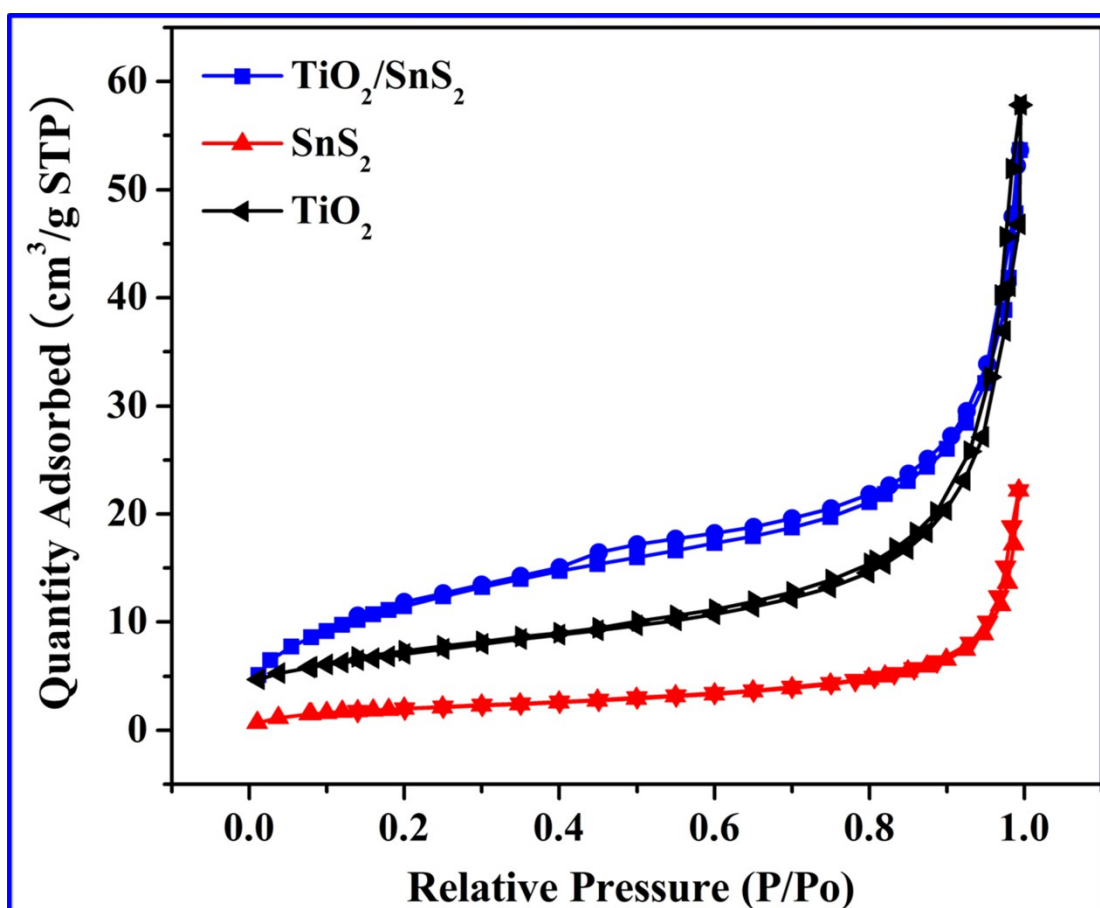

**Figure S6.** N<sub>2</sub> adsorption (left) and desorption (right) scanning isotherms of TiO<sub>2</sub> (black), SnS<sub>2</sub> (red), and TiO<sub>2</sub>/SnS<sub>2</sub> (blue).

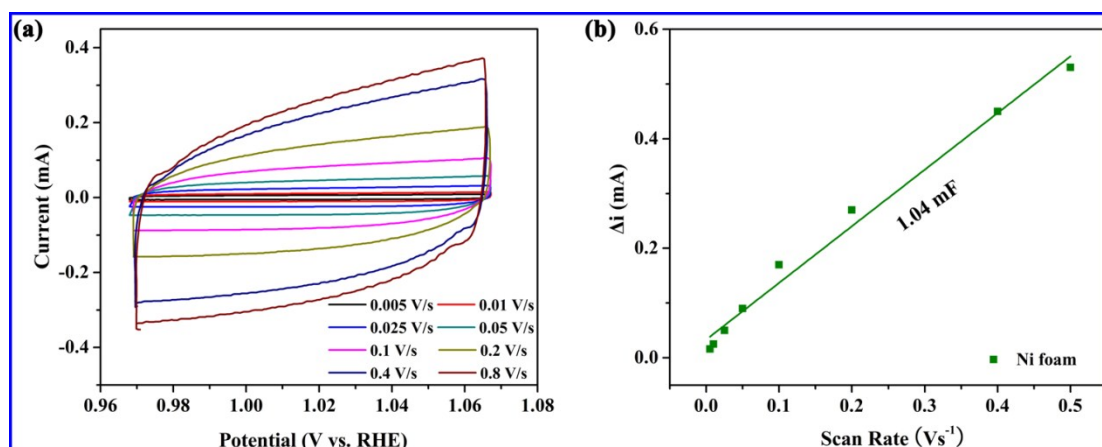

**Figure S7.** Cyclic voltammetry curves at scan rates of 0.005, 0.01, 0.025, 0.05, 0.1, 0.2, 0.4, 0.5V

s-1 of Ni foam; (d) current differences as a function of the scan rate for Ni foam.



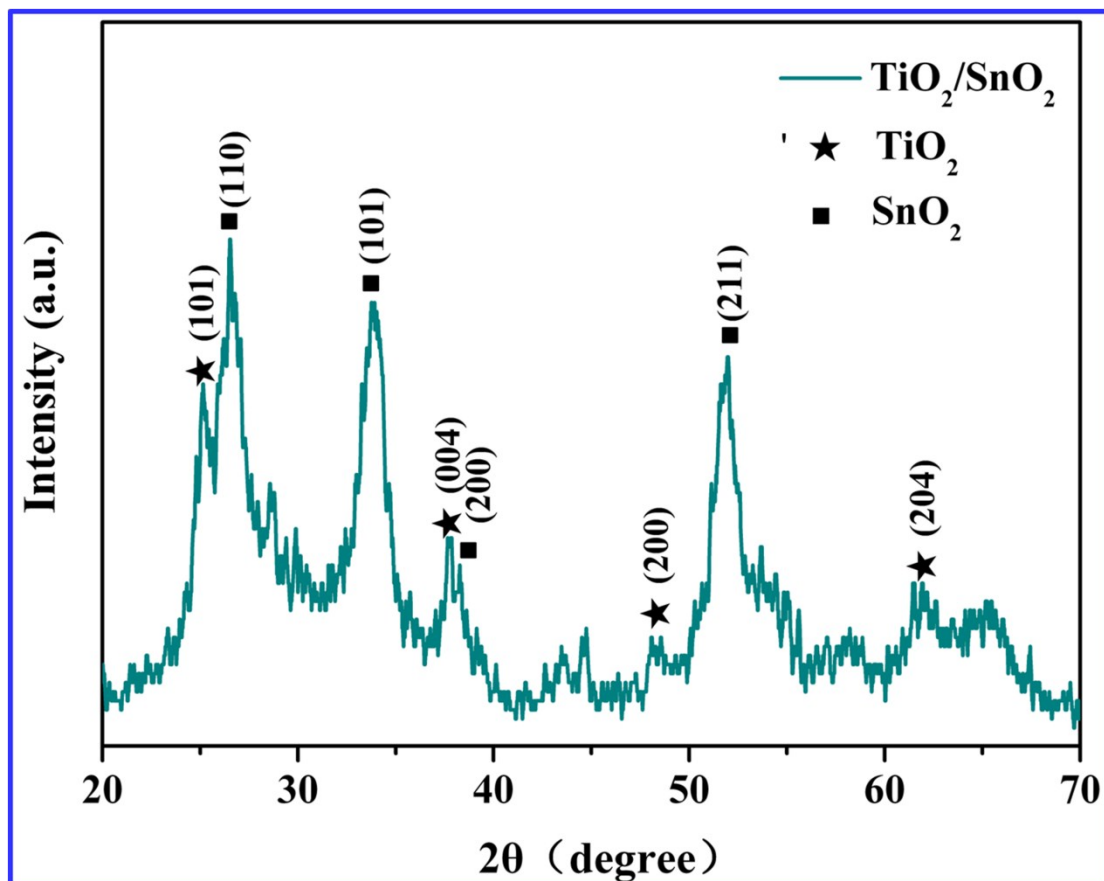

Figure S8. XRD image of TiO<sub>2</sub>/SnO<sub>2</sub>.

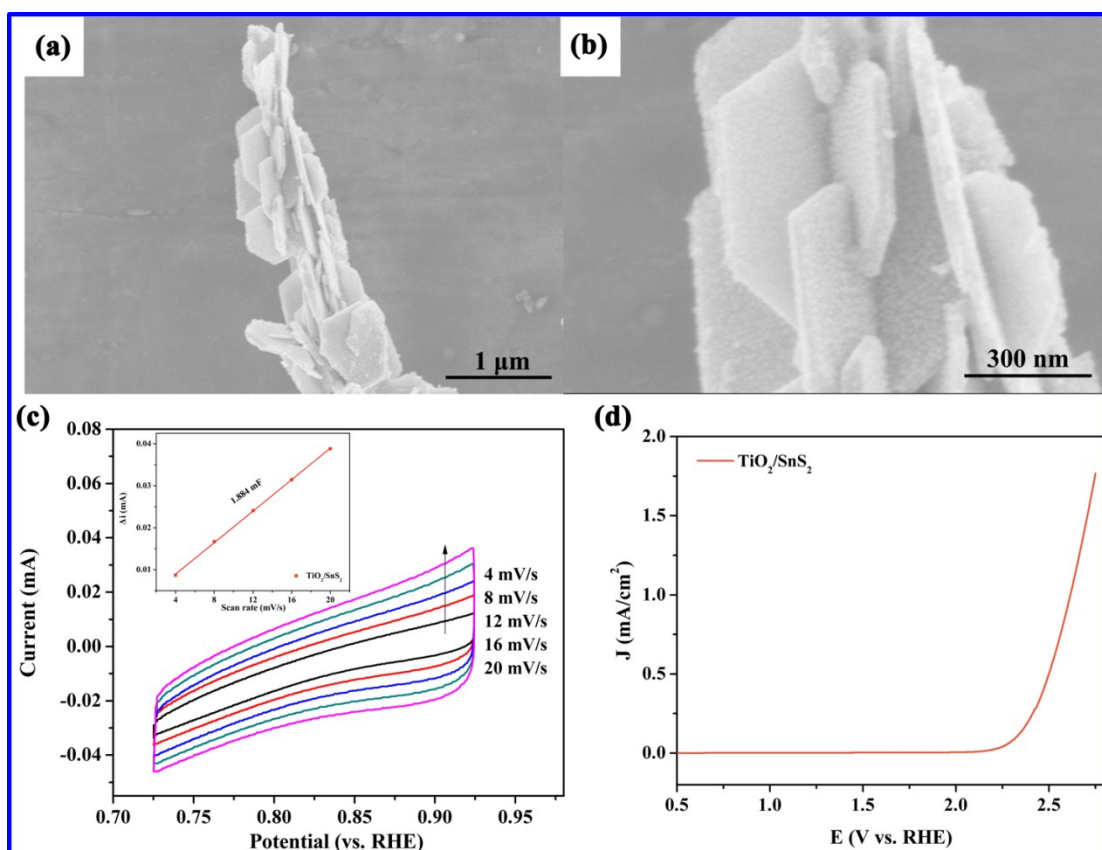

**Figure S9.** SEM images of  $\text{TiO}_2/\text{SnO}_2$  in low and high magnification (a and b); Cyclic voltammetry curves at scan rates of 4, 8, 12, 16, 20  $\text{mV s}^{-1}$  of  $\text{TiO}_2/\text{SnO}_2$  (c); Insert (c) is the current differences as a function of the scan rate for  $\text{TiO}_2/\text{SnO}_2$ ; Linear sweep voltammetry (LSV) curves of  $\text{TiO}_2/\text{SnO}_2$  without further corrected in 1M NaOH, measured with a scan rate of 5  $\text{mV/s}$  (d).

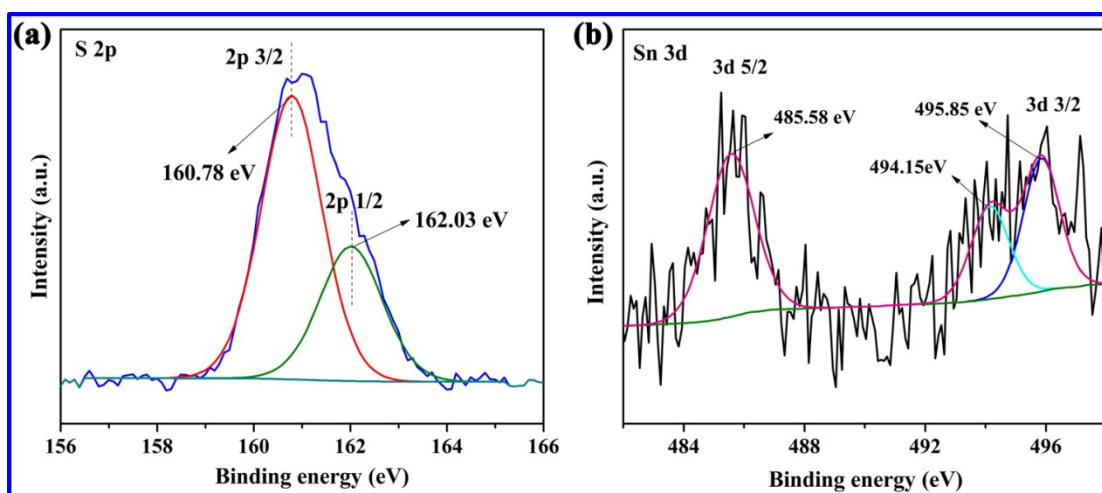

**Figure S10.** High resolution XPS spectrum of S 2p (a) and Sn 3d (b) after electrochemical test in

1 M NaOH.

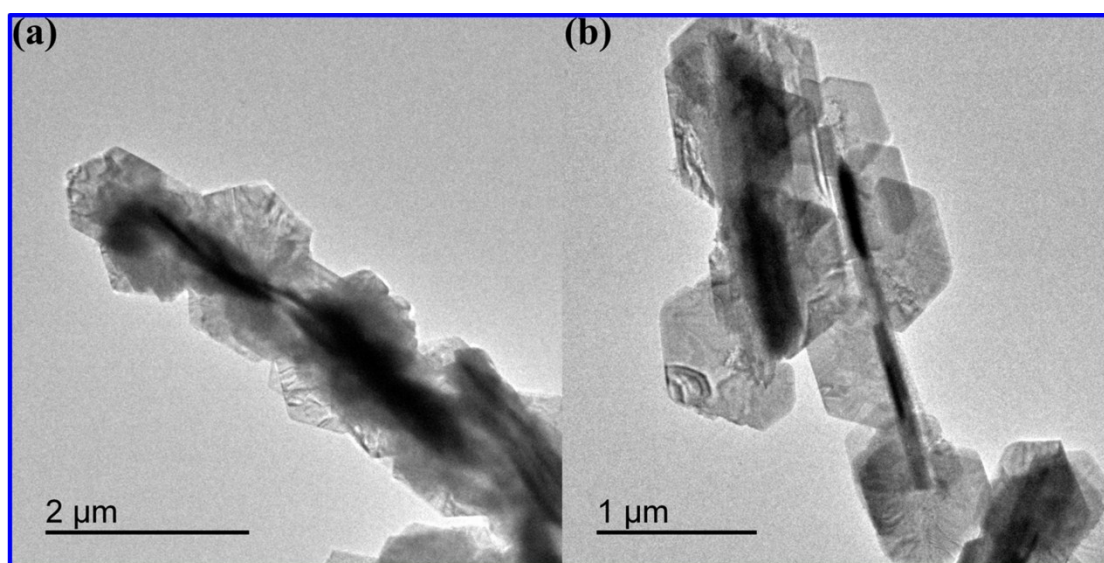

**Figure S11.** TEM images of  $\text{TiO}_2/\text{SnS}_2$  after the electrochemical test.

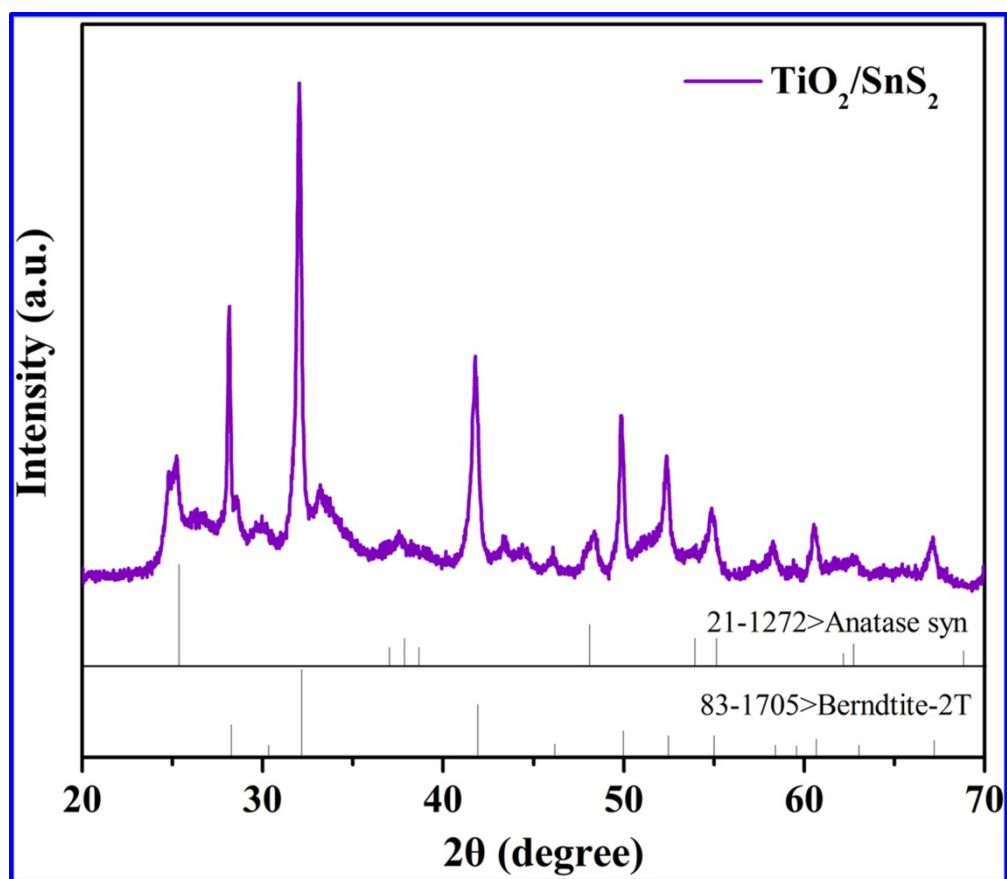

**Figure S12.** XRD image of  $\text{TiO}_2/\text{SnS}_2$  after the electrochemical test.

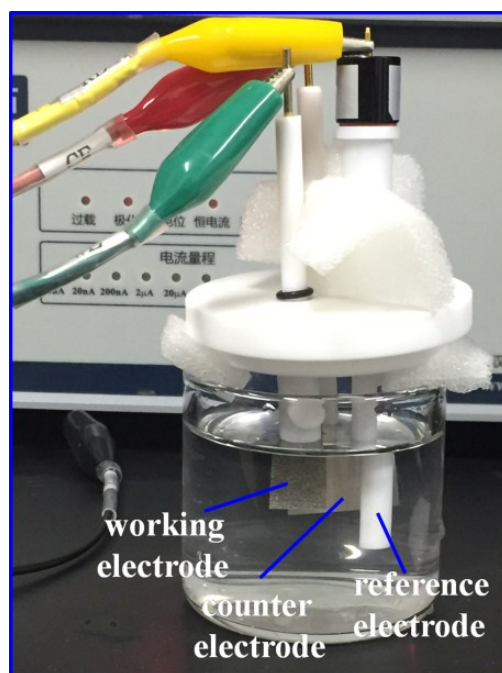

**Figure S13.** The installation drawing of three-electrode system of our testing system with working electrode, reference electrode (Hg/HgO) and counter electrode (Pt sheet).

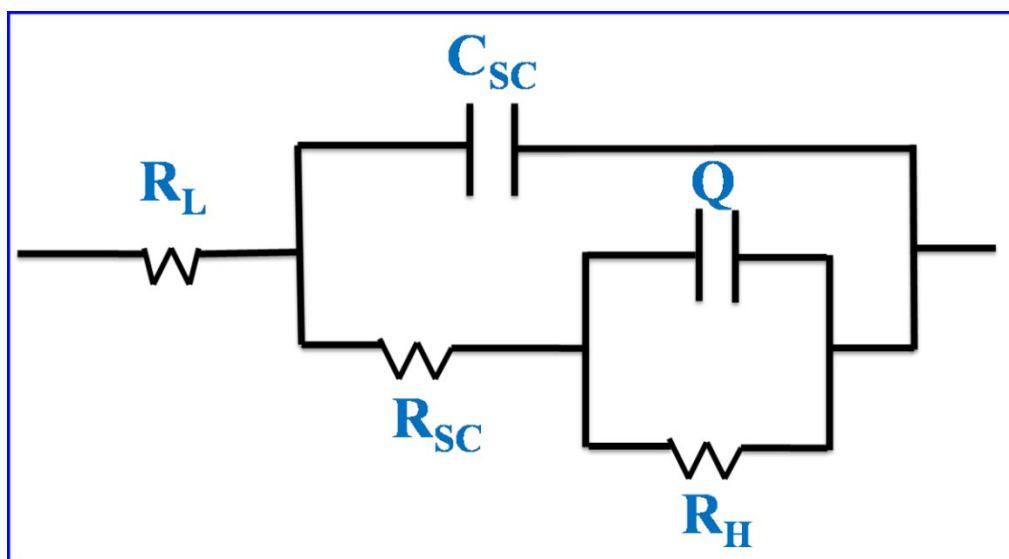

**Scheme 1** Equivalent circuit utilized to model electrochemical impedance spectra for oxygen evolution reaction in 1 M NaOH.
